# Supplementary material for: Multi-View Integrative Approach For Imputing Short-Chain Fatty Acids and Identifying Key factors predicting Blood SCFA
Source: PubMed Central journal article supplement — bioRxiv. 2024 Sep 27:2024.09.25.614767. Preprint. [Version 1] doi: 10.1101/2024.09.25.614767 (PMC11463355; doi:10.1101/2024.09.25.614767), 2024-09-27
Supplement: NIHPP2024.09.25.614767v1-supplement-1.pdf [file NIHPP2024.09.25.614767v1-supplement-1.pdf]

634 **Supplementary Tables**

635

636 **Supplementary Table 1.** Features (Host characteristics and dietary habits) used in Dataset 1.

| <b>Host Characteristics</b>                                                                     | <b>Dietary Habits</b>                                                       |
|-------------------------------------------------------------------------------------------------|-----------------------------------------------------------------------------|
| Age                                                                                             | Whether you drink milk (Yes/No)                                             |
| Race                                                                                            | Whether you eat yogurt (Yes/No)                                             |
| Height (cm)                                                                                     | Whether you eat cheese (Yes/No)                                             |
| Weight (kg)                                                                                     | Quantity of eating vegetables                                               |
| Whether currently exercise on a fairly regular basis (Yes/No)                                   | Quantity of eating fruit                                                    |
| Whether you smoke(d) cigarettes (Yes/No)                                                        | Frequency of eating eggs                                                    |
| Whether you drink (drank) alcohol (Yes/No)                                                      | Quantity of eating eggs in a day                                            |
| Whether you are currently taking any probiotics supplements (Yes/No)                            | Frequency of eating steak                                                   |
| Whether you have you taken any probiotics in the past 12 months (Yes/No)                        | Quantity of eating steak in a day                                           |
| BMI                                                                                             | Frequency of eating pork chops                                              |
| Whether you have used antibiotics in the past 12 months (Yes/No)                                | Quantity of eating pork chops in a day                                      |
| Whether you are currently taking any gastric acid lowering medications (Yes/No)                 | Frequency of eating cookies                                                 |
| Whether you have you taken any gastric acid lowering medications in the past 12 months (Yes/No) | Quantity of eating cookies in a day                                         |
| Frequency of bicycling or swimming                                                              | Frequency of eating chocolate candy                                         |
| Time in bicycling or swimming for each time                                                     | Quantity of eating chocolate candy in a day                                 |
| Frequency of heavy work                                                                         | Frequency of eating cold cereals                                            |
| Time in heavy work for each time                                                                | Quantity of eating cold cereals in a day                                    |
|                                                                                                 | Quantity of drinking water in a day                                         |
|                                                                                                 | Frequency of drinking milky coffee                                          |
|                                                                                                 | Quantity of drinking milky coffee in a day                                  |
|                                                                                                 | Frequency of drinking non-milky coffee                                      |
|                                                                                                 | Quantity of drinking non-milky coffee in a day                              |
|                                                                                                 | Frequency of drinking hot tea                                               |
|                                                                                                 | Quantity of drinking hot tea in a day                                       |
|                                                                                                 | Frequency of eating pickles                                                 |
|                                                                                                 | Quantity of eating pickles in a day                                         |
|                                                                                                 | Frequency of taking folic acid                                              |
|                                                                                                 | Frequency of taking fiber supplements                                       |
|                                                                                                 | Frequency of taking calcium                                                 |
|                                                                                                 | Quantity of taking calcium in a day                                         |
|                                                                                                 | Frequency of taking fat oil                                                 |
|                                                                                                 | Number of meals in a day                                                    |
|                                                                                                 | How much eating fried fish, fish sticks, fish sandwich, breaded fillets (g) |

637

638

639 **Supplementary Table 2.** Features (Host characteristics and dietary habits) used in Dataset 2.

| <b>Host Characteristics</b>                                              | <b>Dietary Habits</b>           |
|--------------------------------------------------------------------------|---------------------------------|
| Age                                                                      | Whether you drink milk (Yes/No) |
| Gender                                                                   | Whether you eat yogurt (Yes/No) |
| Race                                                                     | Whether you eat cheese (Yes/No) |
| Height (cm)                                                              |                                 |
| Weight (kg)                                                              |                                 |
| Whether currently exercise on a fairly regular basis (Yes/No)            |                                 |
| Whether you smoke(d) cigarettes (Yes/No)                                 |                                 |
| Whether you drink (drank) alcohol (Yes/No)                               |                                 |
| Whether you are currently taking any probiotics supplements (Yes/No)     |                                 |
| Whether you have you taken any probiotics in the past 12 months (Yes/No) |                                 |
| BMI                                                                      |                                 |

640

641

642

643

644

**Supplementary Table 3. Hyperparameters Tuning.**

| <b>Hyperparameters</b>                                                            | <b>Values</b>                |
|-----------------------------------------------------------------------------------|------------------------------|
| Dropout                                                                           | 0.1, 0.3, 0.5, 0.7           |
| Number of epochs                                                                  | 1000, 1500, 2000, 2500, 3000 |
| Average number of edges per node that are retained including self-connections (k) | 2, 5, 10                     |

645

646

**Supplementary Table 4.** Important factors associated with blood acetic acids.

| Gut Microbiotas                     |                                                 | Host Characteristics                                                     |                                                                          | Dietary Features                         |                        |
|-------------------------------------|-------------------------------------------------|--------------------------------------------------------------------------|--------------------------------------------------------------------------|------------------------------------------|------------------------|
| Dataset 1                           | Dataset 2                                       | Dataset 1                                                                | Dataset 2                                                                | Dataset 1                                | Dataset 2              |
| Subdoligranulum_unclassified        | Bacteroides_intestinalis                        | Weight (kg)                                                              | Gender                                                                   | Frequency of eating pickles              | Whether you eat yogurt |
| Ruminococcus_torques                | candidate_division_TM7_single_cell_isolate_TM7b | Time in bicycling or swimming for each time                              | Race                                                                     | Frequency of eating steak                | Whether you drink milk |
| Oscillibacter_unclassified          | Atopobium_vaginae                               | Whether you have you taken any probiotics in the past 12 months (Yes/No) | Height (cm)                                                              | Frequency of taking fat oil              | Whether you eat cheese |
| Bacteroides_uniformis               | Weissella_confusa                               | Height (cm)                                                              | Weight (kg)                                                              | Quantity of eating eggs in a day         |                        |
| Clostridium_asparagiforme           | Lachnospiraceae_bacterium_2_1_46FAA             | Whether you have used antibiotics in the past 12 months (Yes/No)         | Whether you have you taken any probiotics in the past 12 months (Yes/No) | Quantity of eating cold cereals in a day |                        |
| <b>Ruminococcus_sp_5_1_39BFAA</b>   | Bombyx_mori_nucleopolyhedrovirus                |                                                                          |                                                                          |                                          |                        |
| <b>Rothia_mucilaginosa</b>          | Streptococcus_mutans                            |                                                                          |                                                                          |                                          |                        |
| Prevotella_copri                    | Faecalibacterium_prausnitzii                    |                                                                          |                                                                          |                                          |                        |
| Roseburia_intestinalis              | Clostridium_sp_HGF2                             |                                                                          |                                                                          |                                          |                        |
| <b>Bacteroides_thetaiotaomicron</b> | Ruminococcus_obeum                              |                                                                          |                                                                          |                                          |                        |
| Desulfovibrio_piger                 | Bordetella_unclassified                         |                                                                          |                                                                          |                                          |                        |
| Alistipes_unclassified              | Anaerococcus_vaginalis                          |                                                                          |                                                                          |                                          |                        |
| Bifidobacterium_catenulatum         | Alistipes_sp_HGB5                               |                                                                          |                                                                          |                                          |                        |
| Lactobacillus_salivarius            | Avian_carcinoma_virus                           |                                                                          |                                                                          |                                          |                        |
| Clostridium_leptum                  | New_World_begomovirus_associated_satellite_DNA  |                                                                          |                                                                          |                                          |                        |
| Acidaminococcus_sp_BV3L6            | Sapporo_virus                                   |                                                                          |                                                                          |                                          |                        |

|                                             |                                                 |
|---------------------------------------------|-------------------------------------------------|
| <b>Erysipelotrichaceae_bacterium_6_1_45</b> | Bifidobacterium_breve                           |
| <b>Bacteroides_fragilis</b>                 | Gemella_sanguinis                               |
| Parabacteroides_merdae                      | Fusobacterium_necrophorum                       |
| Alistipes_senegalensis                      | Culex_flavivirus                                |
| Mitsuokella_unclassified                    | Anaerotruncus_colihominis                       |
| Bacteroides_caccae                          | Lachnospiraceae_bacterium_5_1_63FAA             |
| Turcibacter_unclassified                    | Bacteroides_cellulosilyticus                    |
| Bacteroides_sp_4_3_47FAA                    | Porphyromonas_asaccharolytica                   |
| Blautia_hansenii                            | Alistipes_finegoldii                            |
| Clostridium_clostridioforme                 | Facklamia_unclassified                          |
| Rhodococcus_erythropolis                    | Staphylococcus_phage_phiETA3                    |
| Clostridium_citroniae                       | Cupriavidus_unclassified                        |
| Ruminococcus_albus                          | Chicory_yellow_mottle_virus_large_satellite_RNA |
| Bacteroides_eggertii                        | Erysipelotrichaceae_bacterium_21_3              |
|                                             | Gemella_unclassified                            |
|                                             | Porphyromonas_uenonis                           |
|                                             | Classical_swine_fever_virus                     |
|                                             | Eubacterium_infirmum                            |
|                                             | Enterovirus_B                                   |
|                                             | Escherichia_unclassified                        |
|                                             | Eubacterium_sp_3_1_31                           |
|                                             | Coprobacillus_unclassified                      |

ed

Bovine\_viral\_diarrhea\_virus\_2

Fusobacterium\_nucleatum

Coprobacter\_fastidiosus

Coprobacillus\_sp\_D6

Clostridiales\_bacterium\_1\_7\_47FAA

Ruminococcus\_sp\_JC304

Bacteroides\_dorei

Mycoplasma\_hominis

Actinomyces\_urogenitalis

Bovine\_viral\_diarrhea\_virus\_3

Royal\_Farm\_virus

Prevotella\_timonensis

Pseudomonas\_thermotolerans

Coprococcus\_sp\_ART55\_1

Bacteroides\_pectinophilus

Blautia\_hydrogenotrophica

Dorea\_unclassified

Collinsella\_aerofaciens

Sutterella\_wadsworthensis

Eubacterium\_biforme

Clostridiales\_bacterium\_BV3C26

Clostridium\_sp\_KLE\_1755

Melon\_aphid\_borne\_yell

ows\_virus  
Veillonella\_dispar  
Bacteroides\_salysersiae  
Clostridium\_bartlettii  
Lachnospiraceae\_bacteri  
um\_9\_1\_43BFAA  
Campylobacter\_ureolyti  
cus  
Lactobacillus\_antri  
Montana\_myotis\_leukoe  
ncephalitis\_virus  
Entamoeba\_dispar  
Leuconostoc\_gelidum  
Caulobacter\_unclassified  
Fusobacterium\_periodon  
ticum  
Coriobacteriaceae\_bacte  
rium\_BV3Ac1  
Cardiobacterium\_valvar  
um  
**Bacteroides\_fragilis**  
Bifidobacterium\_pseudo  
longum  
Porphyromonas\_bennoni  
s  
Orthohepadnavirus\_uncl  
assified  
Ruminococcus\_gnavus  
Alistipes\_sp\_AP11  
Enterovirus\_D  
Lactobacillus\_mucosae  
Streptococcus\_macedoni  
cus  
**Bacteroides\_thetaiota  
micron**  
Coprobacillus\_sp\_29\_1

Chicken\_anemia\_virus  
Lachnospiraceae\_bacteri  
um\_1\_4\_56FAA  
Eggerthella\_lenta  
Cetobacterium\_somerae  
Circovirus\_like\_genome  
\_SAR\_A  
Granulicatella\_elegans  
Ruminococcus\_flavefaci  
ens  
Parascardovia\_denticole  
ns  
Pseudomonas\_phage\_M  
P38  
Bilophila\_unclassified  
Actinomyces\_viscosus  
Actinomyces\_naeslundii  
Streptococcus\_agalactiae  
Salmon\_pancreas\_diseas  
e\_virus  
C2likevirus\_unclassified

---

Note: Top 30 gut microbiota species in dataset 1; top 100 gut microbiota species in dataset 2. Top 5 host characteristics features and top 5 dietary features in datasets 1 and 2.

647  
648



**Supplementary Table 5.** Important factors associated with blood butyric acids.

| Gut Microbiotas                      |                                     | Host Characteristics                                                            |                                                                          | Dietary Features                            |                        |
|--------------------------------------|-------------------------------------|---------------------------------------------------------------------------------|--------------------------------------------------------------------------|---------------------------------------------|------------------------|
| Dataset 1                            | Dataset 2                           | Dataset 1                                                                       | Dataset 2                                                                | Dataset 1                                   | Dataset 2              |
| Ruminococcus_torques                 | Ruminococcaceae_bacterium_D16       | Weight (kg)                                                                     | Gender                                                                   | Frequency of eating pickles                 | Whether you eat yogurt |
| Subdoligranulum_unclassified         | Nilaparvata_lugens_honeydew_virus_2 | Whether you have you taken any probiotics in the past 12 months (Yes/No)        | Race                                                                     | Quantity of eating cold cereals in a day    | Whether you drink milk |
| Roseburia_intestinalis               | Bordetella_unclassified             | Whether you are currently taking any gastric acid lowering medications (Yes/No) | Weight (kg)                                                              | Quantity of eating chocolate candy in a day | Whether you eat cheese |
| Oscillibacter_unclassified           | Providencia_unclassified            | Height (cm)                                                                     | BMI                                                                      | Frequency of eating steak                   |                        |
| Bifidobacterium_catenulatum          | Weissella_confusa                   | Whether you have used antibiotics in the past 12 months (Yes/No)                | Whether you have you taken any probiotics in the past 12 months (Yes/No) | Quantity of eating steak in a day           |                        |
| Bacteroides_thetaiotaomicron         | Coprococcus_sp_ART55_1              |                                                                                 |                                                                          |                                             |                        |
| Parabacteroides_merdae               | Coriobacteriaceae_bacterium_BV3Ac1  |                                                                                 |                                                                          |                                             |                        |
| Turicibacter_unclassified            | Eubacterium_infirmum                |                                                                                 |                                                                          |                                             |                        |
| Bacteroides_cacciae                  | Corynebacterium_durum               |                                                                                 |                                                                          |                                             |                        |
| Bacteroides_uniformis                | Apoi_virus                          |                                                                                 |                                                                          |                                             |                        |
| Prevotella_copri                     | Alistipes_finegoldii                |                                                                                 |                                                                          |                                             |                        |
| Rothia_mucilaginososa                | Plectrovirus_unclassified           |                                                                                 |                                                                          |                                             |                        |
| Erysipelotrichaceae_bacterium_6_1_45 | Actinomyces_turicensis              |                                                                                 |                                                                          |                                             |                        |
| Erysipelotrichaceae_bacterium_6_1_45 | Anaerostipes_caccae                 |                                                                                 |                                                                          |                                             |                        |
| Blautia_hansenii                     | Alistipes_indistinctus              |                                                                                 |                                                                          |                                             |                        |
| Ruminococcus_spp_5_1_39BFAA          | Parabacteroides_johnsonii           |                                                                                 |                                                                          |                                             |                        |

|                                     |                                     |
|-------------------------------------|-------------------------------------|
| Alistipes_senegalensis              | Erysipelotrichaceae_bacterium_21_3  |
| Desulfovibrio_piger                 | Eggerthella_unclassified            |
| Bacteroides_vulgaris                | Lactobacillus_animalis              |
| <b>Veillonella_unclassified</b>     | Lactobacillus_vaginalis             |
| <b>Streptococcus_salivarius</b>     | Campylobacter_ureolyticus           |
| Lactobacillus_plantarum             | Atopobium_parvulum                  |
| Rhodococcus_erythropolis            | Enterococcus_casseliflavus          |
| Eubacterium_limosum                 | Leuconostoc_pseudomenteroides       |
| <b>Faecalibacterium_prausnitzii</b> | Megasphaera_micronuciformis         |
| Ruminococcus_albus                  | Desulfovibrio_terminidis            |
| <b>Oscillibacter_sp_KLE_1745</b>    | Enterococcus_avium                  |
| Propionibacterium_freudenreichii    | Peptostreptococcus_unclassified     |
| <b>Clostridium_amaragiforme</b>     | Lachnospiraceae_bacterium_5_1_63FAA |
| Weissella_unclassified              | Clostridium_sp_HGF2                 |
|                                     | Quail_picornavirus_QPV1_HUN_2010    |
|                                     | Leuconostoc_carnosum                |
|                                     | Dialister_succinatiphilus           |
|                                     | Prevotella_bergensis                |
|                                     | Actinobacillus_unclassified         |
|                                     | Ruminococcus_obeum                  |
|                                     | Bifidobacterium_pseudotenulatum     |
|                                     | Alistipes_sp_AP11                   |

Collinsella\_stercoris  
Porphyromonas\_uenonis  
Streptococcus\_tigurinus  
Turicibacter\_sanguinis  
Actinomyces\_massiliensis  
Bacteroides\_intestinalis  
Anaerostipes\_sp\_3\_2\_56F  
AA  
Cupriavidus\_unclassified  
Weissella\_paramesenteroides  
Holdemania\_unclassified  
Clostridium\_hathewayi  
**Streptococcus\_salivarius**  
Chicory\_yellow\_mottle\_virus\_large\_satellite\_RNA  
Leuconostoc\_mesenteroides  
Odoribacter\_splanchnicus  
Culex\_flavivirus  
Clostridiales\_bacterium\_BV3C26  
Blautia\_hydrogenotrophica  
Clostridiaceae\_bacterium\_JC118  
Clostridium\_glycolicum  
Clostridium\_sp\_KLE\_1755  
Bifidobacterium\_pseudolongum  
Collinsella\_aerofaciens  
**Veillonella\_unclassified**  
Leuconostoc\_inhae  
Dysgonomonas\_unclassifi

ed

Okra\_yellow\_crinkle\_Cam

eroon\_alphasatellite

Streptococcus\_australis

Lactobacillus\_helveticus

Bovine\_viral\_diarrhea\_vir

us\_2

Rhodopseudomonas\_palus

tris

Bacteroides\_pectinophilus

Bacteroides\_coprocola

Passion\_fruit\_woodiness\_

virus

Slackia\_unclassified

Prevotella\_timonensis

Bombyx\_mori\_nucleopoly

hedrovirus

Hepatitis\_C\_virus

Fusobacterium\_necrophor

um

Anaerococcus\_vaginalis

Avian\_carcinoma\_virus

Clostridium\_bifermentans

Gastropod\_associated\_circ

ular\_ssDNA\_virus

Actinomyces\_urogenitalis

Olsenella\_unclassified

Bilophila\_wadsworthia

Hafnia\_alvei

Oat\_blue\_dwarf\_virus

Dorea\_formicigenerans

Akkermansia\_muciniphila

Hepatitis\_A\_virus

Streptococcus\_mutans

Lactobacillus\_salivarius  
Lactobacillus\_casei\_parac  
asei  
Pepper\_vein\_yellows\_viru  
s  
**Oscillibacter\_sp\_KLE\_1  
745**  
Bacteroidales\_bacterium\_  
ph8  
Mycoplasma\_hominis  
Ruminococcus\_bromii  
Pseudomonas\_thermotoler  
ans  
Cardiobacterium\_valvaru  
m  
Lindernia\_anagallis\_yello  
w\_vein\_virus\_satellite\_D  
NA\_beta

---

Note: Top 30 gut microbiota species in dataset 1 ; top 100 gut microbiota species in dataset 2. Top 5 host characteristics features and top 5 dietary features in datasets 1 and 2.

649  
650

**Supplementary Table 6.** Important factors associated with blood hexanoic acids.

| Gut Microbiotas                     |                                                 | Host Characteristics             |                                                                          | Dietary Features                  |                        |
|-------------------------------------|-------------------------------------------------|----------------------------------|--------------------------------------------------------------------------|-----------------------------------|------------------------|
| Dataset 1                           | Dataset 2                                       | Dataset 1                        | Dataset 2                                                                | Dataset 1                         | Dataset 2              |
| Subdoligranulum_unclassified        | Ruminococcus_bromii                             | Weight (kg)                      | Consent_Age                                                              | Quantity of eating steak in a day | Whether you eat yogurt |
| Ruminococcus_torques                | Erysipelotrichaceae_bacterium_21_3              | Frequency of heavy work          | Gender                                                                   | Quantity of eating eggs in a day  | Whether you drink milk |
| Oscillibacter_unclassified          | <b>Faecalibacterium_prausnitzii</b>             | Height (cm)                      | Height (cm)                                                              | Frequency of eating steak         | Whether you eat cheese |
| Alistipes_unclassified              | Lachnospiraceae_bacterium_5_1_63FAA             | Exercise_Regular                 | Race                                                                     | Frequency of eating pickles       |                        |
| Clostridium_asparagiforme           | Ruminococcaceae_bacterium_D16                   | Time in heavy work for each time | Whether you have you taken any probiotics in the past 12 months (Yes/No) | Frequency of taking fat oil       |                        |
| Bacteroides_uniformis               | Desulfovibrio_termitidis                        |                                  |                                                                          |                                   |                        |
| Desulfovibrio_piger                 | Collinsella_stercoris                           |                                  |                                                                          |                                   |                        |
| Rothia_mucilaginosa                 | Coriobacteriaceae_bacterium_BV3Ac1              |                                  |                                                                          |                                   |                        |
| <b>Ruminococcus_sp_5_1_39BFAA</b>   | candidate_division_TM7_single_cell_isolate_TM7b |                                  |                                                                          |                                   |                        |
| Clostridium_leptum                  | Lactobacillus_phage_PL_1                        |                                  |                                                                          |                                   |                        |
| Bacteroides_thetaiotaomicron        | Clostridium_sp_HGF2                             |                                  |                                                                          |                                   |                        |
| Roseburia_intestinalis              | Dorea_formicigenerans                           |                                  |                                                                          |                                   |                        |
| Lactobacillus_salivarius            | Classical_swine_fever_virus                     |                                  |                                                                          |                                   |                        |
| Prevotella_copri                    | Solobacterium_moorei                            |                                  |                                                                          |                                   |                        |
| Clostridium_citroniae               | Lactobacillus_casei_paracasei                   |                                  |                                                                          |                                   |                        |
| Bacteroides_nordii                  | Gemella_unclassified                            |                                  |                                                                          |                                   |                        |
| <b>Faecalibacterium_prausnitzii</b> | Actinomyces_naeslundii                          |                                  |                                                                          |                                   |                        |
| Parabacteroides_unclassified        | Turicibacter_sanguinis                          |                                  |                                                                          |                                   |                        |
| Bifidobacterium_cate                | Lactobacillus_saerimneri                        |                                  |                                                                          |                                   |                        |

nulatum

|                                      |                                                          |
|--------------------------------------|----------------------------------------------------------|
| Bacteroides_sp_4_3_47FAA             | Ruminococcus_obeum                                       |
| Clostridium_bolteae                  | Bordetella_unclassified                                  |
| Clostridium_clostridioforme          | Lindernia_anagallis_yellow_vein_virus_satellite_DNA_beta |
| <b>Acidaminococcus_sp_BV3L6</b>      | Enterovirus_B                                            |
| Erysipelotrichaceae_bacterium_6_1_45 | Lachnospiraceae_bacterium_4_1_37FAA                      |
| Paraprevotella_clara                 | Clostridiaceae_bacterium_JC118                           |
| Bacteroides_fragilis                 | Roseburia_inulinivorans                                  |
| Bacteroides_dorei                    | Weissella_confusa                                        |
| Leuconostoc_gelidum                  | <b>Acidaminococcus_sp_BV3L6</b>                          |
| Bacteroides_eggerthii                | Ruminococcus_sp_JC304                                    |
| Blautia_hansenii                     | Clostridium_bifermentans                                 |
|                                      | Chicory_yellow_mottle_virus_large_satellite_RNA          |
|                                      | Campylobacter_ureolyticus                                |
|                                      | Oat_blue_dwarf_virus                                     |
|                                      | Streptococcus_vestibularis                               |
|                                      | Coriobacteriaceae_bacterium_phi                          |
|                                      | I                                                        |
|                                      | Enterobacteria_phage_SfV                                 |
|                                      | Facklamia_unclassified                                   |
|                                      | Actinomyces_viscosus                                     |
|                                      | Ruminococcus_champanellensis                             |
|                                      | Actinomyces_massiliensis                                 |
|                                      | Lactobacillus_animalis                                   |
|                                      | Anaerostipes_caccae                                      |
|                                      | Quail_picornavirus_QPV1_HUN_2010                         |
|                                      | West_Nile_virus                                          |

Atopobium\_vaginae  
Lactococcus\_lactis  
Bacteroides\_intestinalis  
Sida\_yellow\_vein\_Vietnam\_virus\_satellite\_DNA\_beta  
Streptococcus\_parasanguinis  
Enterococcus\_avium  
Rothia\_dentocariosa  
Bovine\_rhinitis\_B\_virus  
Weissella\_paramesenteroides  
Bovine\_viral\_diarrhea\_virus\_2  
Barbel\_circovirus  
Parvimonas\_unclassified  
Dysgonomonas\_unclassified  
**Ruminococcus\_sp\_5\_1\_39BFA**  
**A**  
Fusobacterium\_mortiferum  
Gastropod\_associated\_circular\_sDNA\_virus  
Parascardovia\_denticolens  
Erysipelotrichaceae\_bacterium\_5\_2\_54FAA  
Lactobacillus\_vaginalis  
Neisseria\_flavescens  
Phascolarctobacterium\_succinatutens  
Entamoeba\_dispar  
Circovirus\_like\_genome\_SAR\_A  
Sutterella\_wadsworthensis  
Human\_cosavirus\_B  
Providencia\_unclassified  
Leuconostoc\_carnosum  
Peptostreptococcus\_anaerobius



Kelp\_fly\_virus  
Fusobacterium\_necrophorum  
Hepatitis\_GB\_virus\_B  
Pennisetum\_mosaic\_virus  
Gemella\_haemolysans  
Blautia\_hydrogenotrophica  
Bacteroides\_cellulosilyticus  
Eubacterium\_infirmum  
Bilophila\_wadsworthia  
Petunia\_vein\_clearing\_virus  
Porphyromonas\_asaccharolytica  
Clostridiales\_bacterium\_BV3C2  
6  
Holdemania\_unclassified  
Lactococcus\_phage\_jm2  
Klebsiella\_phage\_KP36  
Plectrovirus\_unclassified  
Bifidobacterium\_breve  
Parabacteroides\_sp\_20\_3  
Okra\_yellow\_crinkle\_Cameroon  
\_alphasatellite  
Border\_disease\_virus  
Melon\_aphid\_borne\_yellows\_virus  
Oligella\_urethralis  
Lactobacillus\_antri  
Candidatus\_Zinderia\_insecticola  
Haemophilus\_sputorum  
Malvastrum\_leaf\_curl\_Philippines\_betasatellite  
Weissella\_cibaria  
Actinomyces\_urogenitalis

---

651 Note: Top 30 gut microbiota species in dataset 1 ; top 100 gut microbiota species in dataset 2. Top 5 host characteristics features and top 5 dietary features in  
652 datasets 1 and 2.  
653

**Supplementary Table 7.** Important factors associated with blood 2-methylbutyric acids.

| Gut Microbiotas                     |                                                 | Host Characteristics                        |                                                                      | Dietary Features                  |                        |
|-------------------------------------|-------------------------------------------------|---------------------------------------------|----------------------------------------------------------------------|-----------------------------------|------------------------|
| Dataset 1                           | Dataset 2                                       | Dataset 1                                   | Dataset 2                                                            | Dataset 1                         | Dataset 2              |
| Subdoligranulum_unclassified        | candidate_division_TM7_singlé_cell_isolate_TM7b | Weight (kg)                                 | Race                                                                 | Frequency of eating steak         | Whether you drink milk |
| Ruminococcus_torques                | Ruminococcus_obeum                              | Time in bicycling or swimming for each time | Gender                                                               | Frequency of eating pickles       | Whether you eat yogurt |
| Bacteroides_uniformis               | Weissella_confusa                               | Height (cm)                                 | BMI                                                                  | Quantity of eating eggs in a day  | Whether you eat cheese |
| Bifidobacterium_catenulatum         | Lactobacillus_phage_PL_1                        | Age                                         | Whether you have taken any probiotics in the past 12 months (Yes/No) | Frequency of taking fat oil       |                        |
| Oscillibacter_unclassified          | <b>Faecalibacterium_prausnitzii</b>             | Race                                        | Weight (kg)                                                          | Quantity of eating steak in a day |                        |
| Clostridium_asparagiforme           | Bovine_viral_diarrhea_virus_2                   |                                             |                                                                      |                                   |                        |
| Ruminococcus_albus                  | Anaerostipes_unclassified                       |                                             |                                                                      |                                   |                        |
| Alistipes_senegalensis              | Coriobacteriaceae_bacterium_BV3Ac1              |                                             |                                                                      |                                   |                        |
| Alistipes_unclassified              | Okra_yellow_crinkle_Cameroon_alphasatellite     |                                             |                                                                      |                                   |                        |
| Roseburia_intestinalis              | Klebsiella_phage_KP36                           |                                             |                                                                      |                                   |                        |
| Veillonella_unclassified            | Candidatus_Zinderia_insecticola                 |                                             |                                                                      |                                   |                        |
| <b>Faecalibacterium_prausnitzii</b> | Bordetella_unclassified                         |                                             |                                                                      |                                   |                        |
| Bacteroides_thetaiotaomicron        | Cardiobacterium_valvarum                        |                                             |                                                                      |                                   |                        |
| Prevotella_copri                    | Eubacterium_siraeum                             |                                             |                                                                      |                                   |                        |
| <b>Rothia_mucilaginosa</b>          | Zinnia_leaf_curl_virus_associated_DNA_beta      |                                             |                                                                      |                                   |                        |
| Acidaminococcus_sp_BV3L6            | Granulicella_unclassified                       |                                             |                                                                      |                                   |                        |
| Clostridium_leptum                  | Bifidobacterium_pseudolongum                    |                                             |                                                                      |                                   |                        |
| Desulfovibrio_piger                 | Clostridium_sp_KLE_1755                         |                                             |                                                                      |                                   |                        |

|                             |                             |
|-----------------------------|-----------------------------|
| <b>Erysipelotrichaceae_</b> | Ruminococcus_champanell     |
| <b>bacterium_6_1_45</b>     | ensis                       |
| Ruminococcus_sp_5_          | Orthohepadnavirus_unclass   |
| 1_39BFAA                    | ified                       |
| Lactobacillus_salivari      | Campylobacter_ureolyticus   |
| us                          |                             |
| Clostridium_scindens        | Parabacteroides_sp_20_3     |
| Weissella_unclassifie       | Streptococcus_agalactiae    |
| d                           |                             |
| Paraprevotella_clara        | Dysgonomonas_mossii         |
| Bacteroides_eggerthii       | Dorea_formicigenerans       |
| <b>Bacteroides_fragilis</b> | Alloprevotella_tannerae     |
| Bacteroides_sp_4_3_         | Aggregatibacter_segnis      |
| 47FAA                       |                             |
| Roseburia_hominis           | Borrelia_duttonii           |
| Bacteroides_nordii          | Granulicatella_unclassified |
| Bacteroides_caccae          | Holdemania_sp_AP2           |
|                             | Gemella_haemolysans         |
|                             | Enterobacteria_phage_SfV    |
|                             | Streptococcus_vestibularis  |
|                             | Sapporo_virus               |
|                             | Streptococcus_mutans        |
|                             | Anaerotruncus_colihominis   |
|                             | Erysipelotrichaceae_bacteri |
|                             | um_21_3                     |
|                             | Coprobacter_fastidiosus     |
|                             | Eubacterium_ramulus         |
|                             | Haemophilus_pittmaniae      |
|                             | Olsenella_unclassified      |
|                             | Alistipes_sp_HGB5           |
|                             | Actinomyces_urogenitalis    |
|                             | Lachnospiraceae_bacterium   |
|                             | _5_1_63FAA                  |
|                             | Alloprevotella_unclassified |

Pseudomonas\_phage\_MP3  
8  
Lactobacillus\_crispatus  
Prevotella\_amnii  
Bacteroides\_coprocola  
Anaerococcus\_vaginalis  
Enterococcus\_hirae  
Eubacterium\_biforme  
Barbel\_circovirus  
Cetobacterium\_somerae  
Butyrivibrio\_crossotus  
Peptostreptococcus\_anaero  
bius  
Bovine\_viral\_diarrhea\_viru  
s\_3  
Pediococcus\_lolii  
Helicobasidium\_mompa\_e  
ndornavirus\_1  
Culex\_flavivirus  
Leuconostoc\_gasicomitatu  
m  
Oligella\_urethralis  
Bacteroides\_dorei  
Bovine\_rhinitis\_B\_virus  
Brachyspira\_unclassified  
Streptococcus\_gordonii  
Abiotrophia\_defectiva  
Lachnospiraceae\_bacterium  
\_4\_1\_37FAA  
Alistipes\_finegoldii  
Desulfovibrio\_terminidis  
Lachnospiraceae\_bacterium  
\_9\_1\_43BFAA  
Clostridium\_bifermentans

Entamoeba\_dispar  
Lachnospiraceae\_bacterium  
\_8\_1\_57FAA  
Infectious\_flacherie\_virus  
Bifidobacterium\_breve  
Lactobacillus\_fermentum  
Lactobacillus\_gasseri  
**Rothia\_mucilaginosa**  
Pseudomonas\_aeruginosa  
**Bacteroides\_fragilis**  
Clostridium\_sp\_HGF2  
Apoi\_virus  
Staphylococcus\_phage\_phi  
ETA3  
Turicibacter\_sanguinis  
Lactobacillus\_saerimneri  
**Erysipelotrichaceae\_bacte  
rium\_6\_1\_45**  
Sepik\_virus  
Porphyromonas\_asaccharol  
ytica  
Clostridium\_difficile  
Streptococcus\_macedonicu  
s  
Gastropod\_associated\_circ  
ular\_ssDNA\_virus  
Subdoligranulum\_variabile  
Hippeastrum\_mosaic\_virus  
Prevotella\_bergensis  
Colombian\_datura\_virus  
Dorea\_unclassified  
Royal\_Farm\_virus  
Enterovirus\_B

Blautia\_hydrogenotrophica

---

654 Note: Top 30 gut microbiota species in dataset 1 ; top 100 gut microbiota species in dataset 2. Top 5 host characteristics features and top 5 dietary features in  
655 datasets 1 and 2.  
656  
657

**Supplementary Table 8.** Important factors associated with blood valeric acids.

| Gut Microbiotas              |                                                 | Host Characteristics                                                                            |             | Dietary Features                            |                        |
|------------------------------|-------------------------------------------------|-------------------------------------------------------------------------------------------------|-------------|---------------------------------------------|------------------------|
| Dataset 1                    | Dataset 2                                       | Dataset 1                                                                                       | Dataset 2   | Dataset 1                                   | Dataset 2              |
| Subdoligranulum_unclassified | Ruminococcus_obeum                              | Weight (kg)                                                                                     | Gender      | Frequency of eating pickles                 | Whether you drink milk |
| Ruminococcus_torques         | Weissella_confusa                               | Whether you have you taken any gastric acid lowering medications in the past 12 months (Yes/No) | Race        | Quantity of eating chocolate candy in a day | Whether you eat yogurt |
| Oscillibacter_unclassified   | Epsilon15likevirus_unclassified                 | Whether you have you taken any probiotics in the past 12 months (Yes/No)                        | Height (cm) | Quantity of eating fruit                    | Whether you eat cheese |
| Rothia_mucilaginosa          | <b>Faecalibacterium_prausnitzii</b>             | Time in heavy work for each time                                                                | Weight (kg) | Quantity of eating cold cereals in a day    |                        |
| Alistipes_unclassified       | Classical_swine_fever_virus                     | Frequency of bicycling or swimming                                                              | BMI         | Frequency of eating steak                   |                        |
| Desulfovibrio_piger          | Campylobacter_ureolyticus                       |                                                                                                 |             |                                             |                        |
| Clostridium_asparagiforme    | Desulfovibrio_terminidis                        |                                                                                                 |             |                                             |                        |
| Bacteroides_thetaiotaomicron | Clostridium_sp_HGF2                             |                                                                                                 |             |                                             |                        |
| Bacteroides_uniformis        | Bovine_rhinitis_B_virus                         |                                                                                                 |             |                                             |                        |
| Bacteroides_nordii           | C2likevirus_unclassified                        |                                                                                                 |             |                                             |                        |
| Clostridium_bolteae          | candidate_division_TM7_single_cell_isolate_TM7b |                                                                                                 |             |                                             |                        |
| Parabacteroides_unclassified | Eubacterium_sp_3_1_31                           |                                                                                                 |             |                                             |                        |
| Bacteroides_dorei            | Corynebacterium_propinquum                      |                                                                                                 |             |                                             |                        |
| Clostridium_citroniae        | Gemella_unclassified                            |                                                                                                 |             |                                             |                        |
| Collinsella_unclassified     | Prevotella_bergensis                            |                                                                                                 |             |                                             |                        |
| Clostridium_clostridioforme  | Neisseria_flavescens                            |                                                                                                 |             |                                             |                        |
| Bacteroides_fragilis         | Cyclovirus_NGchicken15_NGA_2009                 |                                                                                                 |             |                                             |                        |



|                                      |                                             |
|--------------------------------------|---------------------------------------------|
| <b>Faecalibacterium_prausnitzii</b>  | Okra_yellow_crinkle_Cameroon_alphasatellite |
| Clostridium_leptum                   | Alloprevotella_unclassified                 |
| Eubacterium_ramulus                  | Lachnospiraceae_bacterium_5_1_63FAA         |
| Bacteroides_sp_4_3_47FAA             | Peptostreptococcus_anaerobius               |
| Actinomyces_viscosus                 | Bacteroides_vulgatus                        |
| Ruminococcus_sp_5_1_39BFAA           | Actinomyces_urogenitalis                    |
| Parabacteroides_merdae               | Ruminococcus_champanelensis                 |
| <b>Leuconostoc_gelidum</b>           | Lactobacillus_phage_PL_1                    |
| Prevotella_copri                     | Gastropod_associated_circular_ssDNA_virus   |
| Lactobacillus_salivarius             | Lactobacillus_antri                         |
| <b>Escherichia_unclassified</b>      | Corynebacterium_jeikeium                    |
| Bacteroides_eggerthii                | Coprococcus_comes                           |
| Erysipelotrichaceae_bacterium_6_1_45 | Bordetella_unclassified                     |
|                                      | Rhodospirillum_unclassified                 |
|                                      | Neisseria_unclassified                      |
|                                      | Streptococcus_parasanguinis                 |
|                                      | JC_polyomavirus                             |
|                                      | Prevotella_bivia                            |
|                                      | Lachnospiraceae_bacterium_4_1_37FAA         |
|                                      | Pseudomonas_alcaligenes                     |
|                                      | Bilophila_wadsworthia                       |
|                                      | Pseudomonas_phage_MP38                      |

Parabacteroides\_sp\_20\_3  
Stomatobaculum\_longum  
Lactobacillus\_saerimneri  
Slow\_bee\_paralysis\_virus  
Parvimonas\_unclassified  
Providencia\_unclassified  
Enterovirus\_B  
Megasphaera\_genomosp\_t  
ype\_1  
Alistipes\_putredinis  
Cetobacterium\_somerae  
Pepper\_vein\_yellows\_virus  
s  
Actinobacillus\_unclassified  
d  
Clostridiales\_bacterium\_1  
\_7\_47FAA  
Alistipes\_sp\_HGB5  
Porphyromonas\_uenonis  
Eubacterium\_cylindroides  
Bifidobacterium\_longum  
Enterobacter\_cloacae  
Enterobacteria\_phage\_HK  
225  
Bifidobacterium\_breve  
Bacteroides\_coprocola  
Streptococcus\_gordonii  
Atopobium\_parvulum  
Blautia\_producta  
Atopobium\_vaginae  
Bean\_common\_mosaic\_necrosis\_virus  
Melon\_aphid\_borne\_yellows\_virus

Morganella\_morganii  
Streptococcus\_mutans  
Pestivirus\_strain\_Aydin\_0  
4\_TR  
Streptococcus\_tigurinus  
Lachnospiraceae\_bacteriu  
m\_8\_1\_57FAA  
Rothia\_dentocariosa  
Bacteroides\_cellulosilyticu  
s  
Clostridium\_sp\_KLE\_175  
5  
Solobacterium\_moorei  
Porphyromonas\_asaccharo  
lytica  
**Leuconostoc\_gelidum**  
Veillonella\_unclassified  
Clostridium\_difficile  
Orthohepadnavirus\_unclas  
sified  
Clostridium\_hathewayi  
Hippeastrum\_mosaic\_viru  
s  
Streptococcus\_gallolyticus  
Eubacterium\_dolichum  
Collinsella\_stercoris  
Alloprevotella\_tannerae  
Acidaminococcus\_sp\_D21  
Dorea\_unclassified  
Fusobacterium\_nucleatum  
Candida\_glabrata  
Anaerotruncus\_colihomini  
s  
Anaerococcus\_prevotii

Lactobacillus\_sakei  
Coprobacillus\_unclassified  
Hepatitis\_GB\_virus\_B  
Helicobasidium\_mompa\_e  
ndornavirus\_1  
Fig\_fleck\_associated\_virus  
Prevotella\_timonensis  
Cardiobacterium\_valvaru  
m  
Collinsella\_aerofaciens

---

658 Note: Top 30 gut microbiota species in dataset 1 ; top 100 gut microbiota species in dataset 2. Top 5 host characteristics features and top 5 dietary features in  
659 datasets 1 and 2.  
660  
661

**Supplementary Table 9.** Important factors associated with blood propionic acids.

| <b>Gut Microbiotas</b>               |                                      | <b>Host Characteristics</b>                                              |                  | <b>Dietary Features</b>                     |                        |
|--------------------------------------|--------------------------------------|--------------------------------------------------------------------------|------------------|---------------------------------------------|------------------------|
| <b>Dataset 1</b>                     | <b>Dataset 2</b>                     | <b>Dataset 1</b>                                                         | <b>Dataset 2</b> | <b>Dataset 1</b>                            | <b>Dataset 2</b>       |
| Subdoligranulum_unclassified         | Weissella_confusa                    | Whether you have you taken any probiotics in the past 12 months (Yes/No) | Gender           | Frequency of eating pickles                 | Whether you eat yogurt |
| Ruminococcus_torques                 | Ruminococcaceae_bacterium_D16        | Weight (kg)                                                              | Race             | Frequency of eating steak                   | Whether you drink milk |
| Oscillibacter_unclassified           | Desulfovibrio_terminidis             | Whether you have used antibiotics in the past 12 months (Yes/No)         | BMI              | Quantity of eating steak in a day           | Whether you eat cheese |
| Bacteroides_uniformis                | Ruminococcus_obeum                   | Age                                                                      | Consent_Age      | Frequency of drinking non-milky coffee      |                        |
| Roseburia_intestinalis               | Lachnospiraceae_bacterium_5_1_6_3FAA | Height (cm)                                                              | Weight (kg)      | Quantity of eating chocolate candy in a day |                        |
| Bacteroides_thetaiotaomicron         | Providencia_unclassified             |                                                                          |                  |                                             |                        |
| Bifidobacterium_catenulatum          | Cyclovirus_NGchicken15_NGA_2009      |                                                                          |                  |                                             |                        |
| Rothia_mucilaginosa                  | Enterovirus_B                        |                                                                          |                  |                                             |                        |
| Alistipes_unclassified               | Porphyromonas_uenonis                |                                                                          |                  |                                             |                        |
| Desulfovibrio_piger                  | Turicibacter_sanguinis               |                                                                          |                  |                                             |                        |
| Prevotella_copri                     | Lactococcus_garvieae                 |                                                                          |                  |                                             |                        |
| Ruminococcus_sp_5_1_39_BFAA          | Ruminococcus_champanellensis         |                                                                          |                  |                                             |                        |
| Clostridium_asparagiforme            | Classical_swine_fever_virus          |                                                                          |                  |                                             |                        |
| Blautia_hansenii                     | Prevotella_nanceiensis               |                                                                          |                  |                                             |                        |
| <b>Faecalibacterium_prausnitzii</b>  | Culex_flavivirus                     |                                                                          |                  |                                             |                        |
| Acidaminococcus_sp_BV3_L6            | Epsilon15likevirus_unclassified      |                                                                          |                  |                                             |                        |
| Turicibacter_unclassified            | Enterobacteria_phage_HK225           |                                                                          |                  |                                             |                        |
| Parabacteroides_merdae               | Bordetella_unclassified              |                                                                          |                  |                                             |                        |
| Erysipelotrichaceae_bacterium_6_1_45 | Actinobacillus_unclassified          |                                                                          |                  |                                             |                        |

|                                 |                                                 |
|---------------------------------|-------------------------------------------------|
| Bacteroides_caccae              | Prevotella_bergensis                            |
| Lactobacillus_salivarius        | Olsenella_unclassified                          |
| Ruminococcus_albus              | <b>Faecalibacterium_prausnitzii</b>             |
| Clostridium_citroniae           | Melon_aphid_borne_yellows_virus                 |
| Alistipes_senegalensis          | Peptostreptococcus_anaerobius                   |
| Bacteroides_nordii              | Streptococcus_galloyticus                       |
| Bacteroides_eggerthii           | Collinsella_aerofaciens                         |
| Bacteroides_sp_4_3_47FA         | Hafnia_alvei                                    |
| A                               |                                                 |
| Clostridium_leptum              | Streptococcus_mutans                            |
| <b>Veillonella_unclassified</b> | candidate_division_TM7_single_cell_isolate_TM7b |
| Bacteroides_vulgatus            | Dorea_formicigenerans                           |
|                                 | Eubacterium_sp_3_1_31                           |
|                                 | Parabacteroides_johnsonii                       |
|                                 | Odoribacter_splanchnicus                        |
|                                 | Lactobacillus_helveticus                        |
|                                 | Bacteroides_phage_B124_14                       |
|                                 | Clostridium_hathewayi                           |
|                                 | Clostridium_bifermentans                        |
|                                 | Corynebacterium_jeikeium                        |
|                                 | Bacteroides_pectinophilus                       |
|                                 | Blautia_hydrogenotrophica                       |
|                                 | Eubacterium_ramulus                             |
|                                 | Enterobacteriaceae_bacterium_9_2_54FAA          |
|                                 | Gastropod_associated_circular_ssDNA_virus       |
|                                 | Lactobacillus_phage_PL_1                        |
|                                 | Fig_fleck_associated_virus                      |
|                                 | Hippeastrum_mosaic_virus                        |
|                                 | Streptococcus_gordonii                          |
|                                 | Anaerotruncus_colihominis                       |

Clostridium\_sp\_HGF2  
Colombian\_datura\_virus  
Streptococcus\_salivarius  
C2likevirus\_unclassified  
Hepatitis\_GB\_virus\_B  
Streptococcus\_tigurinus  
Plectrovirus\_unclassified  
Campylobacter\_ureolyticus  
Avian\_carcinoma\_virus  
Chlorobium\_phaeobacteroides  
Coriobacteriaceae\_bacterium\_BV3  
Ac1  
Clostridium\_nexile  
Clostridium\_difficile  
Gemella\_unclassified  
Weissella\_paramesenteroides  
Actinomyces\_turicensis  
Stomatobaculum\_longum  
Chicory\_yellow\_mottle\_virus\_large\_satellite\_RNA  
Okra\_yellow\_crinkle\_Cameroon\_alpha\_satellite  
Prevotella\_buccalis  
Lachnospiraceae\_bacterium\_8\_1\_5  
7FAA  
Bilophila\_wadsworthia  
Mobiluncus\_curtisii  
Corynebacterium\_amycolatum  
**Veillonella\_unclassified**  
Lachnospiraceae\_bacterium\_7\_1\_5  
8FAA  
Collinsella\_stercoris  
Pestivirus\_strain\_Aydin\_04\_TR

Ruminococcus\_lactaris  
Anaerococcus\_prevotii  
Bacteroides\_ovatus  
Clostridium\_perfringens  
Alistipes\_indistinctus  
Actinomyces\_urogenitalis  
Bifidobacterium\_pseudolongum  
Bifidobacterium\_longum  
Neisseria\_flavescens  
Parabacteroides\_sp\_20\_3  
Facklamia\_unclassified  
Erysipelotrichaceae\_bacterium\_21\_3  
Streptococcus\_phage\_ALQ13\_2  
Human\_cosavirus\_B  
Parsnip\_yellow\_fleck\_virus  
Bovine\_rhinitis\_B\_virus  
Sida\_yellow\_vein\_Vietnam\_virus\_satellite\_DNA\_beta  
Leuconostoc\_mesenteroides  
Ruminococcus\_bromii  
Alistipes\_sp\_HGB5  
Roseburia\_inulinivorans  
Clostridiales\_bacterium\_BV3C26  
Candida\_glabrata  
Slackia\_unclassified

---

662 Note: Top 30 gut microbiota species in dataset 1 ; top 100 gut microbiota species in dataset 2. Top 5 host characteristics features and top 5 dietary features in  
663 datasets 1 and 2.

664

665



**Supplementary Table 10.** Important factors associated with blood isobutyric acids.

| Gut Microbiotas                     |                                                     | Host Characteristics                        |                                                                          | Dietary Features                       |                        |
|-------------------------------------|-----------------------------------------------------|---------------------------------------------|--------------------------------------------------------------------------|----------------------------------------|------------------------|
| Dataset 1                           | Dataset 2                                           | Dataset 1                                   | Dataset 2                                                                | Dataset 1                              | Dataset 2              |
| Subdoligranulum_unclassified        | candidate_division_TM7_sing<br>le_cell_isolate_TM7b | Height (cm)                                 | Race                                                                     | Frequency of eating pickles            | Whether you drink milk |
| Ruminococcus_torques                | Weissella_confusa                                   | Weight (kg)                                 | Gender                                                                   | Quantity of eating steak in a day      | Whether you eat yogurt |
| Oscillibacter_unclassified          | Ruminococcus_obeum                                  | Time in bicycling or swimming for each time | Height (cm)                                                              | Frequency of eating steak              | Whether you eat cheese |
| Bacteroides_uniformis               | Streptococcus_mutans                                | Age                                         | Whether you have you taken any probiotics in the past 12 months (Yes/No) | Quantity of eating eggs in a day       |                        |
| Clostridium_asparagiforme           | Campylobacter_ureolyticus                           | Time in heavy work for each time            | BMI                                                                      | Frequency of drinking non-milky coffee |                        |
| Alistipes_unclassified              | Clostridium_sp_HGF2                                 |                                             |                                                                          |                                        |                        |
| Rothia_mucilaginosa                 | Corynebacterium_jeikeium                            |                                             |                                                                          |                                        |                        |
| Bacteroides_thetaiotaomicron        | Eubacterium_sp_3_1_31                               |                                             |                                                                          |                                        |                        |
| <b>Faecalibacterium_prausnitzii</b> | Desulfovibrio_terminidis                            |                                             |                                                                          |                                        |                        |
| Bifidobacterium_catenulatum         | Bifidobacterium_longum                              |                                             |                                                                          |                                        |                        |
| Roseburia_intestinalis              | Bacteroides_vulgatus                                |                                             |                                                                          |                                        |                        |
| Desulfovibrio_piger                 | <b>Faecalibacterium_prausnitzii</b>                 |                                             |                                                                          |                                        |                        |
| Clostridium_leptum                  | Epsilon15likevirus_unclassified                     |                                             |                                                                          |                                        |                        |
| Ruminococcus_albus                  | Ruminococcus_champanellensis                        |                                             |                                                                          |                                        |                        |
| Ruminococcus_sp_5_1_39BFAA          | Bacteroides_coprocola                               |                                             |                                                                          |                                        |                        |
| Prevotella_copri                    | Bordetella_unclassified                             |                                             |                                                                          |                                        |                        |
| Alistipes_senegalensis              | Providencia_unclassified                            |                                             |                                                                          |                                        |                        |

sis

|                                      |                                             |
|--------------------------------------|---------------------------------------------|
| Lactobacillus_salivarius             | Classical_swine_fever_virus                 |
| Bacteroides_eggertshii               | Bovine_rhinitis_B_virus                     |
| Erysipelotrichaceae_bacterium_6_1_45 | Cetobacterium_somerae                       |
| Acidaminococcus_spp_BV3L6            | Okra_yellow_crinkle_Cameroon_alphasatellite |
| Bacteroides_nordii                   | Lactobacillus_phage_PL_1                    |
| <b>Veillonella_unclassified</b>      | Enterobacteria_phage_SfV                    |
| Bacteroides_sp_4_3_47FAA             | Parabacteroides_sp_20_3                     |
| Bacteroides_caccae                   | Cyclovirus_NGchicken15_NGA_2009             |
| Clostridium_citroniae                | Prevotella_bergensis                        |
| Blautia_hansenii                     | Rhodospirillum_unclassified                 |
| <b>Clostridium_boltea</b>            | Enterobacteria_phage_HK225                  |
| Bacteroides_fragilis                 | C2likevirus_unclassified                    |
| Roseburia_inulinivorans              | Pseudomonas_alcaligenes                     |
|                                      | Neisseria_flavescens                        |
|                                      | Corynebacterium_propinquum                  |
|                                      | Coriobacteriaceae_bacterium_BV3Ac1          |
|                                      | Peptostreptococcus_anaerobius               |
|                                      | Eubacterium_siraeum                         |
|                                      | Bilophila_wadsworthia                       |
|                                      | Circovirus_like_genome_SAR_A                |
|                                      | Bifidobacterium_pseudolongum                |
|                                      | Clostridium_hathewayi                       |

Alistipes\_sp\_HGB5  
Leuconostoc\_gasicomitatum  
Enterovirus\_B  
Melon\_aphid\_borne\_yellows\_  
virus  
Anaerotruncus\_colihominis  
Eubacterium\_cylindroides  
Bifidobacterium\_breve  
Dysgonomonas\_unclassified  
Fusobacterium\_nucleatum  
JC\_polyomavirus  
Prevotella\_buccalis  
Cardiobacterium\_valvarum  
Actinobacillus\_unclassified  
Erysipelotrichaceae\_bacterium  
\_21\_3  
Lactobacillus\_antri  
Facklamia\_unclassified  
Lachnospiraceae\_bacterium\_5  
\_1\_63FAA  
Prevotella\_bivia  
Gemella\_haemolysans  
Clostridium\_difficile  
Solobacterium\_moorei  
Pepper\_vein\_yellows\_virus  
**Veillonella\_unclassified**  
Eubacterium\_ramulus  
Turicibacter\_sanguinis  
Prevotella\_timonensis  
Lindernia\_anagallis\_yellow\_v  
ein\_virus\_satellite\_DNA\_beta  
Enterococcus\_casseliflavus  
Royal\_Farm\_virus

Collinsella\_stercoris  
Human\_cosavirus\_B  
Megasphaera\_unclassified  
Atopobium\_parvulum  
Clostridium\_amosum  
Atopobium\_vaginae  
Fig\_fleck\_associated\_virus  
Marvinbryantia\_formatexigen  
s  
Collinsella\_aerofaciens  
Acidaminococcus\_sp\_D21  
Eubacterium\_dolichum  
Leuconostoc\_gelidum  
Haemophilus\_pittmaniae  
Prevotella\_nanceiensis  
Dorea\_unclassified  
Lactococcus\_raffinolactis  
**Clostridium\_bolteae**  
Helicobasidium\_mompa\_endo  
navirus\_1  
Lactobacillus\_sakei  
Lactobacillus\_vaginalis  
Porphyromonas\_uenonis  
Pestivirus\_strain\_Aydin\_04\_T  
R  
Anaerostipes\_unclassified  
Eggerthella\_sp\_1\_3\_56FAA  
Oligella\_urethralis  
Lachnospiraceae\_bacterium\_8  
\_1\_57FAA  
Halomonas\_unclassified  
Actinomyces\_turicensis  
Gastropod\_associated\_circular

\_ssDNA\_virus

Streptococcus\_vestibularis

Hippeastrum\_mosaic\_virus

Eubacterium\_brachy

---

666 Note: Top 30 gut microbiota species in dataset 1 ; top 100 gut microbiota species in dataset 2. Top 5 host characteristics features and top 5 dietary features in  
667 datasets 1 and 2.

668

669

**Supplementary Table 11.** Important factors associated with blood isovaleric acids.

| Gut Microbiotas                     |                                             | Host Characteristics                                                     |             | Dietary Features                            |                        |
|-------------------------------------|---------------------------------------------|--------------------------------------------------------------------------|-------------|---------------------------------------------|------------------------|
| Dataset 1                           | Dataset 2                                   | Dataset 1                                                                | Dataset 2   | Dataset 1                                   | Dataset 2              |
| Subdoligranulum_unclassified        | Desulfovibrio_termitidis                    | Height (cm)                                                              | Gender      | Frequency of eating pickles                 | Whether you eat yogurt |
| Ruminococcus_torques                | Ruminococcaceae_bacterium_D16               | Weight (kg)                                                              | Race        | Frequency of eating steak                   | Whether you drink milk |
| Oscillibacter_unclassified          | Lactobacillus_phage_PL_1                    | Time in bicycling or swimming for each time                              | Height (cm) | Frequency of drinking non-milky coffee      | Whether you eat cheese |
| Bacteroides_uniformis               | Bovine_viral_diarrhea_virus_2               | Time in heavy work for each time                                         | Weight (kg) | Quantity of eating steak in a day           |                        |
| Rothia_mucilaginosa                 | Lachnospiraceae_bacterium_5_1_63FAA         | Whether you have you taken any probiotics in the past 12 months (Yes/No) | BMI         | Quantity of eating chocolate candy in a day |                        |
| Clostridium_asparagiforme           | Clostridium_sp_KLE_1755                     |                                                                          |             |                                             |                        |
| Bifidobacterium_catenulatum         | Lactobacillus_saerimneri                    |                                                                          |             |                                             |                        |
| Bacteroides_thetaiotaomicron        | Alloprevotella_tannerae                     |                                                                          |             |                                             |                        |
| Roseburia_intestinalis              | Okra_yellow_crinkle_Cameroon_alphasatellite |                                                                          |             |                                             |                        |
| Alistipes_unclassified              | Dorea_formicigenerans                       |                                                                          |             |                                             |                        |
| Desulfovibrio_piger                 | Ruminococcus_obeum                          |                                                                          |             |                                             |                        |
| <b>Faecalibacterium_prausnitzii</b> | Porphyromonas_asaccharolytica               |                                                                          |             |                                             |                        |
| Bacteroides_nordii                  | Turicibacter_sanguinis                      |                                                                          |             |                                             |                        |
| Prevotella_copri                    | Peptostreptococcus_unclassified             |                                                                          |             |                                             |                        |
| Acidaminococcus_sp_BV3L6            | Alloprevotella_unclassified                 |                                                                          |             |                                             |                        |
| Ruminococcus_albus                  | Eubacterium_ramulus                         |                                                                          |             |                                             |                        |
| Alistipes_senegalensis              | Bacteroides_ovatus                          |                                                                          |             |                                             |                        |
| Clostridium_leptum                  | Coriobacteriaceae_bacterium_BV3Ac1          |                                                                          |             |                                             |                        |
| Ruminococcus_sp_5_1_39BFAA          | Avian_carcinoma_virus                       |                                                                          |             |                                             |                        |
| <b>Bacteroides_eggerth</b>          | Weissella_confusa                           |                                                                          |             |                                             |                        |

ii

|                                      |                                                 |
|--------------------------------------|-------------------------------------------------|
| Veillonella_unclassified             | Fig_fleck_associated_virus                      |
| Parabacteroides_merdae               | Streptococcus_salivarius                        |
| Bacteroides_caccae                   | Ruminococcus_champanellensis                    |
| Erysipelotrichaceae_bacterium_6_1_45 | <b>Faecalibacterium_prausnitzii</b>             |
| Clostridium_citroniae                | Slow_bee_paralysis_virus                        |
| Blautia_hansanii                     | Olsenella_unclassified                          |
| Bacteroides_sp_4_3_47FAA             | Klebsiella_pneumoniae                           |
| Lactobacillus_salivarius             | Pestivirus_strain_Aydin_04_TR                   |
| <b>Bacteroides_fragilis</b>          | Enterococcus_avium                              |
| Weissella_unclassified               | Culex_flavivirus                                |
|                                      | Campylobacter_ureolyticus                       |
|                                      | candidate_division_TM7_single_cell_isolate_TM7b |
|                                      | Apoi_virus                                      |
|                                      | Odoribacter_unclassified                        |
|                                      | Barbel_circovirus                               |
|                                      | Enterobacteria_phage_SfV                        |
|                                      | Lactococcus_lactis                              |
|                                      | Weissella_unclassified                          |
|                                      | Lactobacillus_delbrueckii                       |
|                                      | Holdemania_unclassified                         |
|                                      | Actinomyces_urogenitalis                        |
|                                      | Clostridium_sp_HGF2                             |
|                                      | Bilophila_wadsworthia                           |
|                                      | Aggregatibacter_segnis                          |
|                                      | Actinobacillus_unclassified                     |

Valsa\_ceratosperma\_hypovirus\_1

**Bacteroides\_eggerthii**

Campylobacter\_conciscus

Proteus\_mirabilis

Nilaparvata\_lugens\_honeydew\_virus\_2

Zinnia\_leaf\_curl\_virus\_associated\_DNA\_beta

Orthohepadnavirus\_unclassified

Klebsiella\_phage\_KP36

Collinsella\_stercoris

Hippeastrum\_mosaic\_virus

Pseudomonas\_phage\_MP38

Anaerostipes\_unclassified

Oligella\_urethralis

Bifidobacterium\_pseudolongum

Coprobacillus\_unclassified

Candidatus\_Zinderia\_insecticola

Porphyromonas\_uenonis

Collinsella\_aerofaciens

Phascolarctobacterium\_succinatutens

Parabacteroides\_johnsonii

Clostridium\_bifermentans

Bacteroides\_sp\_1\_1\_30

Holdemania\_sp\_AP2

Bovine\_viral\_diarrhea\_virus\_3

Granulicatella\_unclassified

Cardiobacterium\_valvarum

Lachnospiraceae\_bacterium\_8\_1\_57FAA

Blautia\_producta



Escherichia\_sp\_TW09276  
Akkermansia\_muciniphila  
Streptococcus\_peroris  
Lindernia\_anagallis\_yellow\_vein  
\_virus\_satellite\_DNA\_beta  
Corynebacterium\_amycolatum  
Butyrivibrio\_crossotus  
Hepatitis\_C\_virus  
Stomatobaculum\_longum  
Alistipes\_finegoldii  
Sapporo\_virus  
Human\_adenovirus\_B  
Peptostreptococcus\_anaerobius  
Actinomyces\_naeslundii  
Collinsella\_intestinalis  
Parabacteroides\_sp\_20\_3  
Corynebacterium\_durum  
Colombian\_datura\_virus  
**Bacteroides\_fragilis**  
Bordetella\_unclassified  
Anaerostipes\_caccae  
Lactobacillus\_gasseri  
Eubacterium\_siraeum  
Gastropod\_associated\_circular\_s  
sDNA\_virus  
Anaerotruncus\_colihominis  
Barnesiella\_intestinihominis  
Mobiluncus\_curtisii  
Leuconostoc\_inhae

---

670 Note: Top 30 gut microbiota species in dataset 1 ; top 100 gut microbiota species in dataset 2. Top 5 host characteristics features and top 5 dietary features in  
671 datasets 1 and 2.  
672
